# Supplementary material
Source: PubMed Central journal article supplement (PMC4525636)
Supplement: i1552-5783-56-8-5020-s01.pdf [file i1552-5783-56-8-5020-s01.pdf]

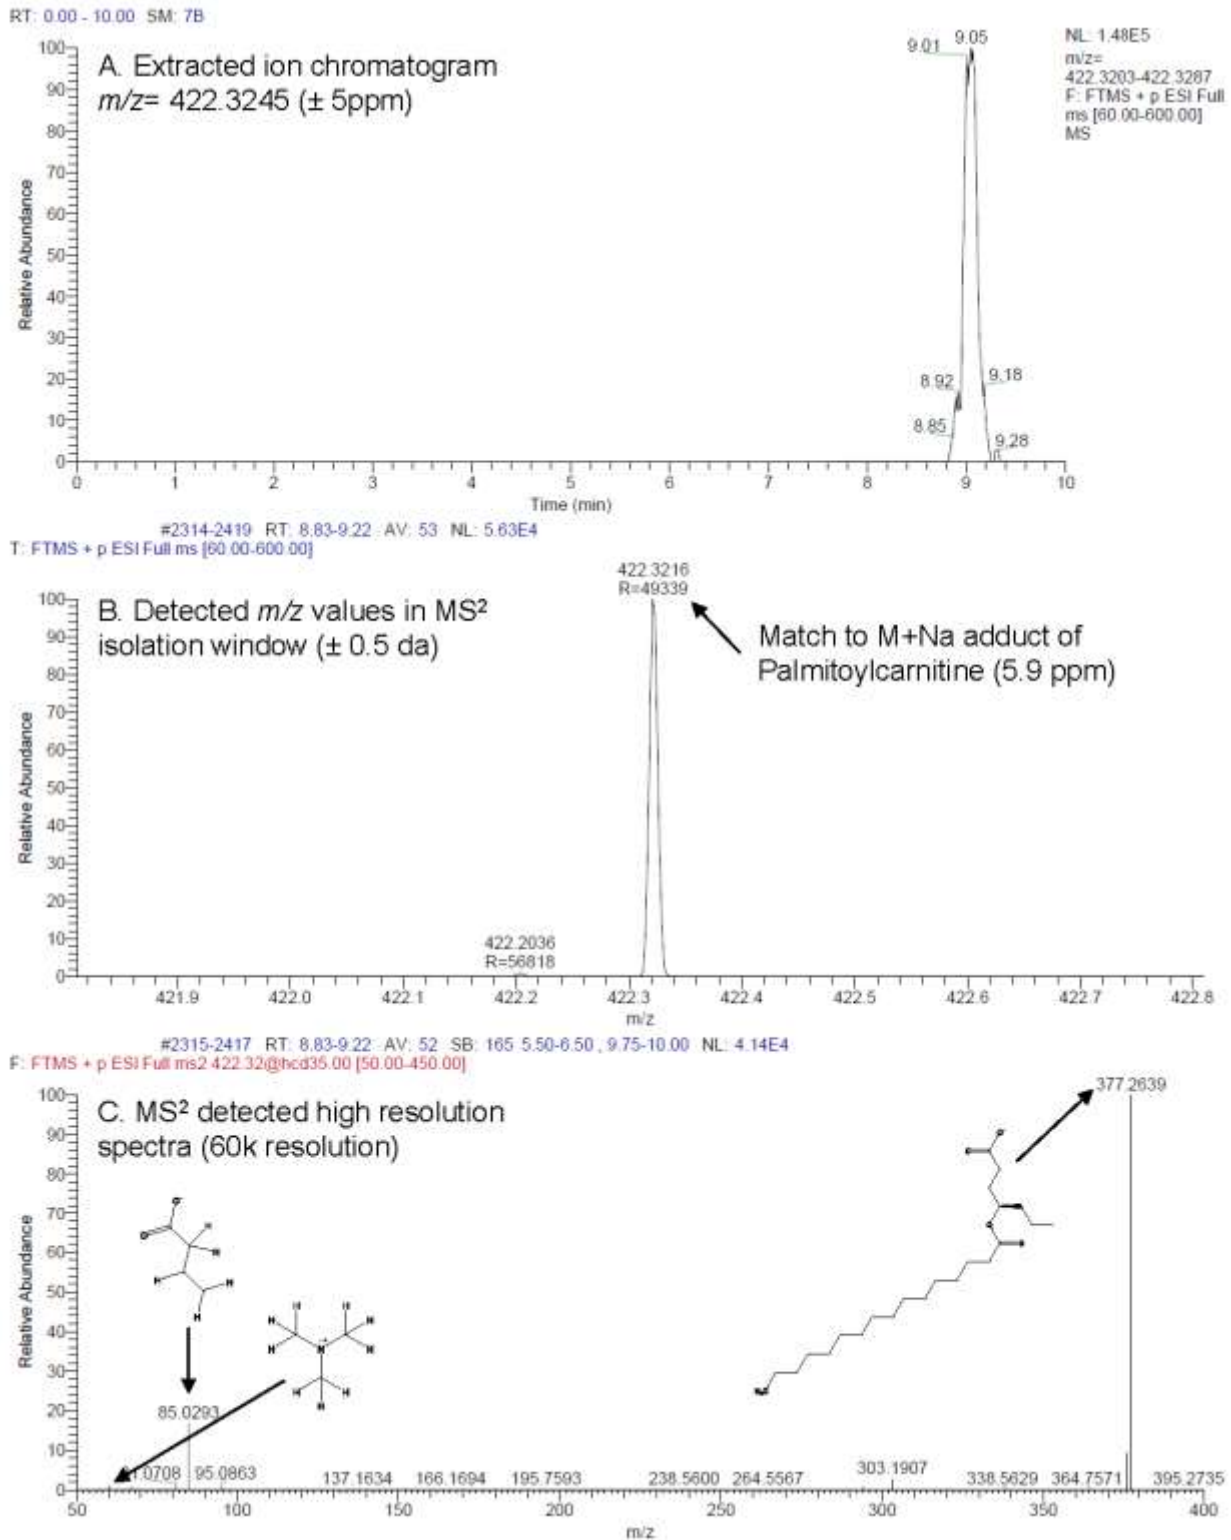

**Supp Figure 1. MS/MS chromatograph of palmitoylcarnitine.** Within the NIST standard, only one peak was present matching the  $m/z$  of the sodium adduct form of palmitoylcarnitine, which eluted at ~540 sec. The later retention time most likely occurred due to the use of a different LC frontend than was used for the non-targeted metabolomic profiling. The mass spectra contained

fragments that were consisted with fragmentation of a carnitine ester. Fragments were observed that corresponded to loss of trimethylamine minus a methyl group (377.2637) and oxonium (85.0293, loss of neutral trimethylamine from the palmitoyl head group). Fragments matching the MS/MS mass spectra in METLIN were also present, including 60.0817 and 95.0863. The presence of these adducts suggests that palmitoylcarnitine is the correct identification. Panel A contains the extracted ion chromatogram (EIC) for the  $m/z$  corresponding to the +Na adduct match of palmitoylcarnitine ( $m/z$  422.3245). Panel B contains the high resolution detected masses (60,000 resolution) within the 1  $m/z$  isolation window selected for MS<sup>2</sup>. Panel C contains the MS<sup>2</sup> fragmentation pattern used for the confirmation of palmitoylcarnitine.

### Supplementary Table 1. Internal standards for mass spectrometry analysis.

1. [<sup>13</sup>C<sub>6</sub>]-D-glucose
2. [<sup>15</sup>N]-indole
3. [2-<sup>15</sup>N]-L-lysine dihydrochloride
4. [<sup>13</sup>C<sub>5</sub>]-L-glutamic acid
5. [<sup>13</sup>C<sub>7</sub>]-benzoic acid
6. [3,4-<sup>13</sup>C<sub>2</sub>]-cholesterol
7. [<sup>15</sup>N]-L-tyrosine
8. [trimethyl-<sup>13</sup>C<sub>2</sub>]-caffeine
9. [<sup>15</sup>N<sub>2</sub>]-uracil
10. [3,3-<sup>13</sup>C<sub>2</sub>]-cystine
11. [1,2-<sup>13</sup>C<sub>2</sub>]-palmitic acid
12. [<sup>15</sup>N, <sup>13</sup>C<sub>5</sub>]-L-methionine
13. [<sup>15</sup>N]-choline chloride
14. 2'-deoxyguanosine-<sup>15</sup>N<sub>2</sub>, <sup>13</sup>C<sub>10</sub>-5' monophosphate

### Supplementary Table 2. Optimized operating conditions for the LTQ Velos Orbitrap.

HESI probe with S-lens combination for ESI  
MS<sup>1</sup> mode scanning  $m/z$  range of 85-2000  
Resolution - 60,000  
Maximum number of ions collected -  $5.00 \times 10^5$   
Maximum injection time - 5  $\mu$ L/s  
Capillary temperature - 275°C  
Source heater - 45°C  
Voltage - 4.6 kV  
Sheath gas - 45  
Auxiliary gas flow - 5  
Sweep gas flow - 0

**Supplementary Table 3: Ocular health and treatments in POAG patients and controls**

|                      | <b>POAG</b> | <b>Control</b> | <b>p-value</b> |
|----------------------|-------------|----------------|----------------|
| Antihypertensives    | 44 (61.1)   | 43 (59.7)      | 1.000          |
| Statins              | 28 (38.9)   | 26 (36.1)      | 0.863          |
| Diabetes medications | 12 (16.7)   | 19 (26.4)      | 0.610          |
| Insulin              | 1 (1.4)     | 2 (2.8)        | 1.000          |
| Corticosteroids      | 7 (9.7)     | 10 (13.9)      | 0.607          |
| Thyroid hormone      | 14 (19.4)   | 9 (12.5)       | 0.363          |
| Estrogen             | 5 (6.9)     | 5 (6.9)        | 1.000          |
| Testosterone         | 3 (4.2)     | 2 (2.8)        | 1.000          |
| Vitamin D            | 38 (52.8)   | 31 (34.1)      | 0.320          |

\* Best Corrected Visual Acuity (BCVA) in better-seeing eye. † In either eye.

Any ocular surgery defined as any penetrating ocular surgery, e.g. cataract surgery, trabeculectomy, vitrectomy, and

globe repair.

**Supplementary Table 4: Systemic medications in POAG patients and controls**

|                         | <b>POAG</b> | <b>Control</b> | <b>p-value</b> |
|-------------------------|-------------|----------------|----------------|
| BCVA < 20/40* (%)       | 9 (12.5)    | 0 (0)          | 0.003          |
| Macular drusen† (%)     | 0 (0)       | 4 (5.6)        | 0.120          |
| Cataract surgery† (%)   | 42 (58.3)   | 55 (76.4)      | 0.034          |
| Any ocular surgery† (%) | 49 (68.1)   | 55 (76.4)      | 0.352          |

**Supplementary Table 5. The 41 differentially expressed m/z features with associated p-values.**

| <i>m/z</i> | Retention Time | Mean Intensity |                | P-Value  | Adjusted P-Value |
|------------|----------------|----------------|----------------|----------|------------------|
|            |                | <b>POAG</b>    | <b>Control</b> |          |                  |
| 422.3200   | 399            | 0.6056         | 10.0655        | 4.48E-22 | 1.09E-18         |
| 272.2938   | 370            | 0.2037         | -8.5473        | 1.60E-19 | 1.96E-16         |
| 290.2953   | 344            | 0.3069         | -7.0356        | 2.95E-17 | 1.99E-14         |
| 421.3158   | 394            | -7.1719        | 3.4103         | 3.26E-17 | 1.99E-14         |
| 288.2884   | 345            | 0.4213         | -4.0571        | 2.37E-15 | 1.15E-12         |
| 289.2918   | 345            | 0.4422         | -4.2332        | 1.34E-14 | 5.44E-12         |
| 286.2728   | 350            | -0.2550        | -8.1016        | 3.06E-14 | 1.07E-11         |
| 316.3200   | 368            | 0.4292         | -3.1932        | 3.92E-14 | 1.20E-11         |
| 376.2584   | 398            | -8.1885        | 1.9576         | 1.94E-13 | 5.26E-11         |

|           |     |         |         |          |          |
|-----------|-----|---------|---------|----------|----------|
| 399.3066  | 533 | -0.0533 | -8.1268 | 6.49E-12 | 1.58E-09 |
| 366.3353  | 575 | 9.9792  | 2.7045  | 8.14E-12 | 1.81E-09 |
| 317.3230  | 368 | 0.4813  | -3.5052 | 6.62E-11 | 1.35E-08 |
| 333.2988  | 531 | 0.1488  | -5.2844 | 2.84E-10 | 5.34E-08 |
| 422.3245  | 370 | 0.3522  | -6.1851 | 3.69E-10 | 6.44E-08 |
| 377.3247  | 532 | -1.0216 | -7.8453 | 5.23E-10 | 8.50E-08 |
| 443.3320  | 530 | -0.5401 | -6.8413 | 7.48E-09 | 1.14E-06 |
| 466.4089  | 531 | -1.4803 | -7.8125 | 8.75E-09 | 1.26E-06 |
| 244.2626  | 352 | 0.4986  | -3.8047 | 2.23E-08 | 3.02E-06 |
| 377.2615  | 398 | -6.2669 | 0.7218  | 2.67E-08 | 3.43E-06 |
| 422.3820  | 529 | 0.3401  | -3.6401 | 1.25E-07 | 1.53E-05 |
| 378.3564  | 518 | 0.4488  | -2.3766 | 4.96E-07 | 5.77E-05 |
| 292.2108  | 22  | 0.1441  | -3.1321 | 6.21E-07 | 6.89E-05 |
| 398.2532  | 347 | -0.2515 | -4.1004 | 4.22E-06 | 0.000447 |
| 289.2726  | 531 | 0.5074  | -3.0628 | 4.45E-06 | 0.000452 |
| 314.3041  | 370 | -0.1226 | -3.4051 | 7.63E-06 | 0.000745 |
| 449.3516  | 462 | -0.0917 | -5.0347 | 7.94E-06 | 0.000745 |
| 211.9866  | 128 | -2.9691 | 0.0256  | 7.87E-05 | 0.007109 |
| 422.3271  | 232 | 0.8503  | -2.3039 | 0.000133 | 0.01137  |
| 1265.6270 | 320 | -6.3824 | -2.0388 | 0.000135 | 0.01137  |
| 211.9803  | 49  | -2.8617 | -7.3872 | 0.000247 | 0.020051 |
| 1036.6970 | 501 | -4.1712 | -0.8063 | 0.000255 | 0.020051 |
| 350.3247  | 533 | 0.1031  | -2.2449 | 0.000337 | 0.025705 |
| 438.3773  | 531 | -0.7070 | -3.9830 | 0.000399 | 0.029491 |
| 180.8937  | 90  | -3.7300 | -0.4342 | 0.000611 | 0.043842 |
| 851.8857  | 46  | -1.5215 | -5.3378 | 0.000636 | 0.044182 |
| 482.4182  | 565 | -5.8526 | -2.3188 | 0.000652 | 0.044182 |
| 182.8876  | 68  | -0.0889 | -2.2534 | 0.000674 | 0.044421 |
| 782.8072  | 46  | -4.2051 | -0.8950 | 0.000708 | 0.045491 |
| 1256.1450 | 325 | -5.2867 | -1.7505 | 0.000767 | 0.047166 |
| 311.2549  | 534 | -0.6330 | -2.9864 | 0.000773 | 0.047166 |
| 167.0700  | 419 | -2.8528 | -0.3988 | 0.000796 | 0.047397 |

**Supplementary Table 6. The 41 *m/z* features significantly different between POAG cases and controls, including putative matches to METLIN (10 ppm).**

| Cluster | P Value  | <i>m/z</i> | Presence in POAG Cohort | Putative Matches                                                    |
|---------|----------|------------|-------------------------|---------------------------------------------------------------------|
| 1       | 7.87E-05 | 211.9866   | Lower                   | No Match                                                            |
| 1       | 0.000796 | 167.0700   | Lower                   | 3,4-dihydroxyphenylacetone (tyrosine metabolism)                    |
| 2       | 0.000611 | 180.8937   | Lower                   | 1,2,4,6-tetrachloro-1,4-cyclohexadiene                              |
| 2       | 0.000708 | 782.8072   | Lower                   | No Match                                                            |
| 3       | 0.000247 | 211.9803   | Higher                  | No Match                                                            |
| 3       | 0.000636 | 851.8857   | Higher                  | No Match                                                            |
| 3       | 0.000674 | 182.8876   | Higher                  | No Match                                                            |
| 4       | 3.69E-10 | 422.3245   | Higher                  | Palmitoylcarnitine                                                  |
| 4       | 1.60E-19 | 272.2938   | Higher                  | Heptadecanone                                                       |
| 4       | 2.95E-17 | 290.2953   | Higher                  | Probable <sup>13</sup> C <sub>2</sub> form of 288.280               |
| 4       | 2.37E-15 | 288.2884   | Higher                  | C17 Sphinganine                                                     |
| 4       | 1.34E-14 | 289.2918   | Higher                  | Probable <sup>13</sup> C form of 288.280                            |
| 4       | 3.06E-14 | 286.2728   | Higher                  | C17 Sphingosine; heptadecanedione                                   |
| 4       | 3.92E-14 | 316.3200   | Higher                  | Possible 288.2884 plus 2(-CH <sub>2</sub> -), C19 Sphinganine       |
| 4       | 6.62E-11 | 317.3230   | Higher                  | Probable <sup>13</sup> C form of 316.3200                           |
| 4       | 2.23E-08 | 244.2626   | Higher                  | Pentadecanone                                                       |
| 4       | 6.21E-07 | 292.2108   | Higher                  | Hydroxytetradecanedioic acid                                        |
| 4       | 7.63E-06 | 314.3041   | Higher                  | Heptadecanediol                                                     |
| 4       | 0.000133 | 422.3271   | Higher                  | Monoglyceride (22:5); Triglyceride (12:0/18:4/22:6), cholane tetrol |
| 5       | 6.49E-12 | 399.3066   | Higher                  | FluorohydroxyD3; (Triterpene); DG(24:0/22:6)                        |
| 5       | 8.14E-12 | 366.3353   | Higher                  | Heptadecylbenzenediol                                               |
| 5       | 2.84E-10 | 333.2988   | Higher                  | HODE-cholesteryl ester                                              |
| 5       | 5.23E-10 | 377.3247   | Higher                  | Hydroxyergocalciferol; DG(24:0/22:6)                                |
| 5       | 7.48E-09 | 443.332    | Higher                  | Dihydroergocalciferol; cholestanediol                               |
| 5       | 8.75E-09 | 466.4089   | Higher                  | Ergostanol                                                          |
| 5       | 1.25E-07 | 422.3820   | Higher                  | Diapo-zeta-carotene (terpene)                                       |
| 5       | 4.96E-07 | 378.3564   | Higher                  | No Match                                                            |
| 5       | 4.45E-06 | 289.2726   | Higher                  | No Match                                                            |
| 5       | 0.000337 | 350.3247   | Higher                  | Azacholecalciferol; decaprenol (terpene)                            |
| 5       | 0.000399 | 438.3773   | Higher                  | Ergosterol                                                          |
| 5       | 0.000773 | 311.2549   | Higher                  | HODE-methyl ester; monoglyceride                                    |
| 6       | 3.26E-17 | 421.3158   | Lower                   | Multiple vitamin D analogs; TG (12:0/16:0/20:5)                     |
| 6       | 1.94E-13 | 376.2584   | Lower                   | C19 Sphingosine-1-phosphate                                         |
| 6       | 4.48E-22 | 422.3200   | Lower                   | Probable <sup>13</sup> C form of 421.3158                           |

|          |          |           |        |                                           |
|----------|----------|-----------|--------|-------------------------------------------|
| <b>6</b> | 2.67E-08 | 377.2615  | Lower  | Probable <sup>13</sup> C form of 376.2584 |
| <b>6</b> | 0.000652 | 482.4182  | Lower  | MG(24:1); TG (18:0/18:0/20:0)             |
| <b>6</b> | 0.000767 | 1256.1450 | Lower  | Complex glycosphingolipid                 |
| <b>7</b> | 4.22E-06 | 398.2532  | Higher | Arg/Gln/Ile/Leu - tripeptides             |
| <b>7</b> | 7.94E-06 | 449.3516  | Higher | Squalene, hopane (steroid biosynthesis)   |
| <b>8</b> | 0.000135 | 1265.6270 | Lower  | Balanitesin, a saponin agent              |
| <b>8</b> | 0.000255 | 1036.6970 | Lower  | Surfactin (surfactant)                    |
